# Supplementary material for: The Association between Symptomatic Rotavirus Infection and Histo-Blood Group Antigens in Young Children with Diarrhea in Pretoria, South Africa
Source: MDPI journal article supplement (doi:10.3390/v14122735), 2022-12-08
Supplement: s1 [file s1]

## Supplementary

**Table S1.** Distribution of demographic characteristics in rotavirus positive and negative by site.

|                                | RV negative n = 293 |                | RV positive n = 49 |               |
|--------------------------------|---------------------|----------------|--------------------|---------------|
|                                | DGMAH               | OPHC           | DGMAH              | OPHC          |
| Patients                       | 72<br>(24.6%)       | 221<br>(75.4%) | 29<br>(59.2%)      | 20<br>(40.8%) |
| Sex                            |                     |                |                    |               |
| Male                           | 42<br>(58.3%)       | 104<br>(47.1%) | 17<br>(58.6%)      | 13<br>(65%)   |
| Female                         | 30<br>(41.6%)       | 117<br>(52.9%) | 12<br>(41.4%)      | 7<br>(35%)    |
| Ages of the children in months |                     |                |                    |               |
| 0-6                            | 18<br>(25%)         | 65<br>(29.4%)  | 6<br>(20.7%)       | 4<br>(20%)    |
| 7-12                           | 26<br>(36.1%)       | 68<br>(30.8%)  | 13<br>(44.8%)      | 7<br>(35%)    |
| 13-18                          | 9<br>(12.5%)        | 43<br>(19.5%)  | 7<br>(24.1%)       | 3<br>(15.0%)  |
| 19-24                          | 7<br>(9.7%)         | 23<br>(10.4%)  | 3<br>(10.3%)       | 3<br>(15.0%)  |
| 25-59                          | 12<br>(16.7%)       | 22<br>(9.9%)   | -                  | 3<br>(15.0%)  |
| Rotavirus immunization         |                     |                |                    |               |
| 0 dose (unvaccinated)          | 2<br>(2.7%)         | 2<br>(0.9%)    | -                  | -             |
| 1 dose                         | 8<br>(11.1%)        | 10<br>(4.5%)   | 4<br>(13.8%)       | 1<br>(5%)     |
| 2 doses                        | 49<br>(68.1%)       | 196<br>(88.7%) | 23<br>(79.3%)      | 15<br>(75%)   |
| No RTHC <sup>1</sup>           | 13<br>(18.1%)       | 13<br>(5.9%)   | 2<br>(6.9%)        | 4<br>(20%)    |
| Clinical symptoms <sup>2</sup> |                     |                |                    |               |
| Fever (n = 334)                | 47<br>(65.3%)       | 20<br>(9.1%)   | 17<br>(58.6%)      | 3<br>(15.0%)  |
| Vomiting<br>(n = 332)          | 26<br>(36.1%)       | 23<br>(10.4%)  | 16<br>(55.1%)      | 5<br>(25.0%)  |
| Refusal to eat (n = 332)       | 34<br>(47.2%)       | 54<br>(24.4%)  | 11<br>(10.9%)      | 9<br>(45.0%)  |
| Duration of diarrhoea days     | 3.84                | 4.39           | 2.86               | 3.89          |
